# Supplementary material for: Intracellular Density of Wolbachia Is Mediated by Host Autophagy and the Bacterial Cytoplasmic Incompatibility Gene cifB in a Cell Type-Dependent Manner in Drosophila melanogaster
Source: PubMed Central journal article supplement (PMC7844536; doi:10.1128/mbio.02205-20), 2021-01-12
Supplement: mBio.02205-20-sf001.pdf [file mBio.02205-20-sf001.pdf]

Control

Experimental

Hub Ref(2)p

A

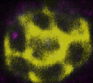

Upd &gt;

B

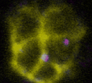

Upd &gt;Atg1 RNAi

A'

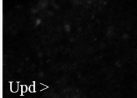

Upd &gt;

B'

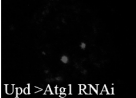

Upd &gt;Atg1 RNAi

C

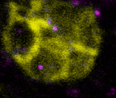

Upd &gt;

D

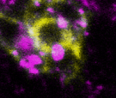

Upd &gt; Atg8a RNAi

E

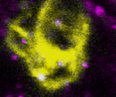

Upd &gt;

F

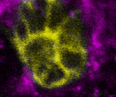

Upd &gt; Ref(2)p RNAi

E'

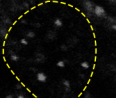

Upd &gt;

F'

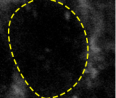

Upd &gt; Ref(2)p RNAi
