# Supplementary material for: Intracellular Density of Wolbachia Is Mediated by Host Autophagy and the Bacterial Cytoplasmic Incompatibility Gene cifB in a Cell Type-Dependent Manner in Drosophila melanogaster
Source: PubMed Central journal article supplement (PMC7844536; doi:10.1128/mbio.02205-20), 2021-01-12

**A**Average  $\Delta\text{Ct}$  [WSP-1433]7  
6  
5  
4  
3  
2  
1  
0 $P = .0114$  $P = .0122$  $P = .0790$ 

Control

RNAi

Control

RNAi

Control

RNAi

Well Fed

2 Day starve

4 Day starve

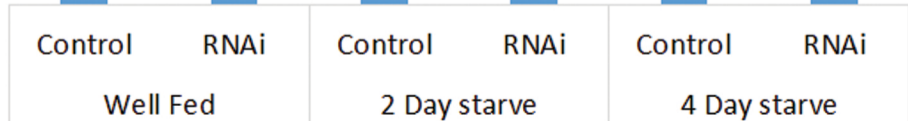

Supplement: mBio.02205-20-sf004.pdf [file mBio.02205-20-sf004.pdf]
