# Supplementary material for: Intracellular Density of Wolbachia Is Mediated by Host Autophagy and the Bacterial Cytoplasmic Incompatibility Gene cifB in a Cell Type-Dependent Manner in Drosophila melanogaster
Source: PubMed Central journal article supplement (PMC7844536; doi:10.1128/mbio.02205-20), 2021-01-12

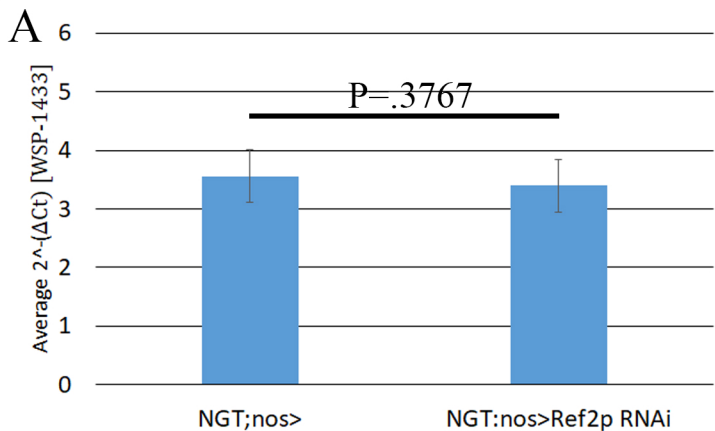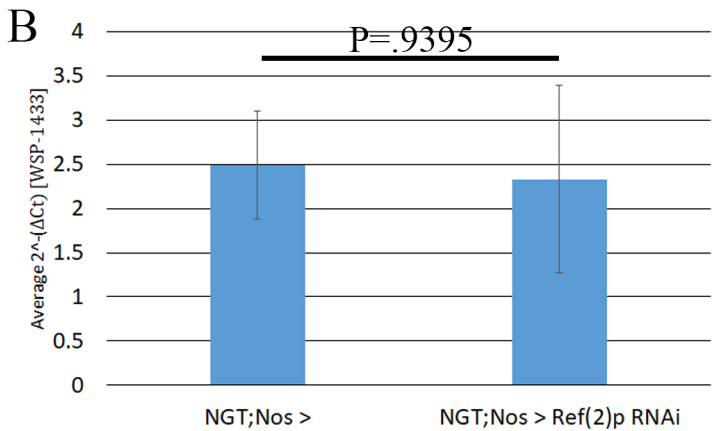

Supplement: mBio.02205-20-sf005.pdf [file mBio.02205-20-sf005.pdf]
